# Supplementary material for: GARN: Sampling RNA 3D Structure Space with Game Theory and Knowledge-Based Scoring Strategies
Source: PubMed Central journal article supplement (PMC4551674; doi:10.1371/journal.pone.0136444), 2015-08-27
Supplement: pone.0136444.s001.pdf [file pone.0136444.s001.pdf]

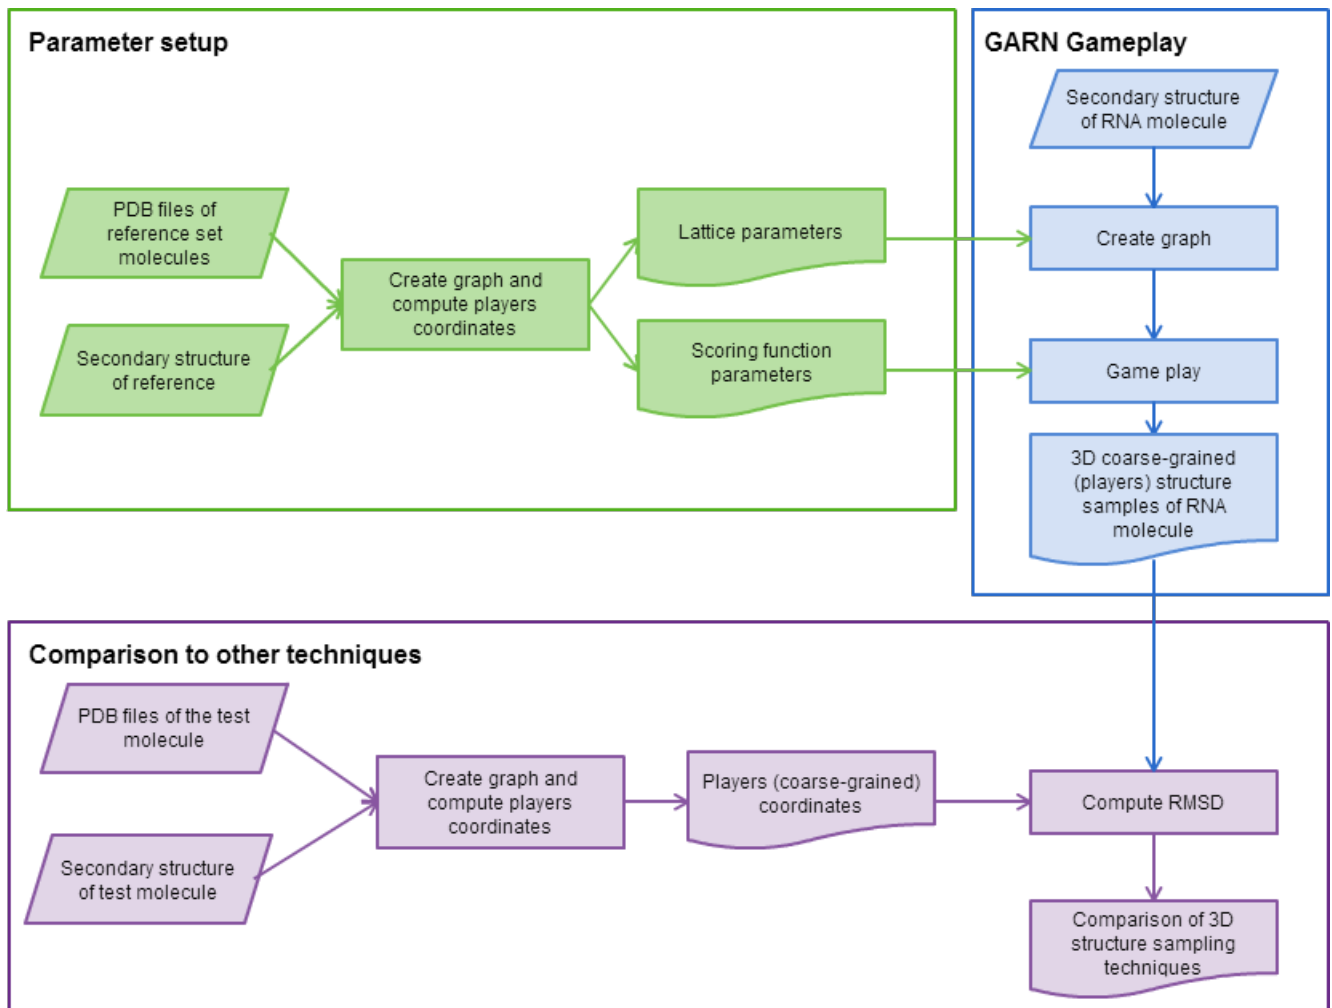

Figure S1: **Overview.** GARN has three parts: (i) the parameter setup for adjusting the game settings, (ii) the game process in GARN and (iii) comparisons with other published techniques.
