# Supplementary material for: GARN: Sampling RNA 3D Structure Space with Game Theory and Knowledge-Based Scoring Strategies
Source: PubMed Central journal article supplement (PMC4551674; doi:10.1371/journal.pone.0136444), 2015-08-27
Supplement: pone.0136444.s003.pdf [file pone.0136444.s003.pdf]

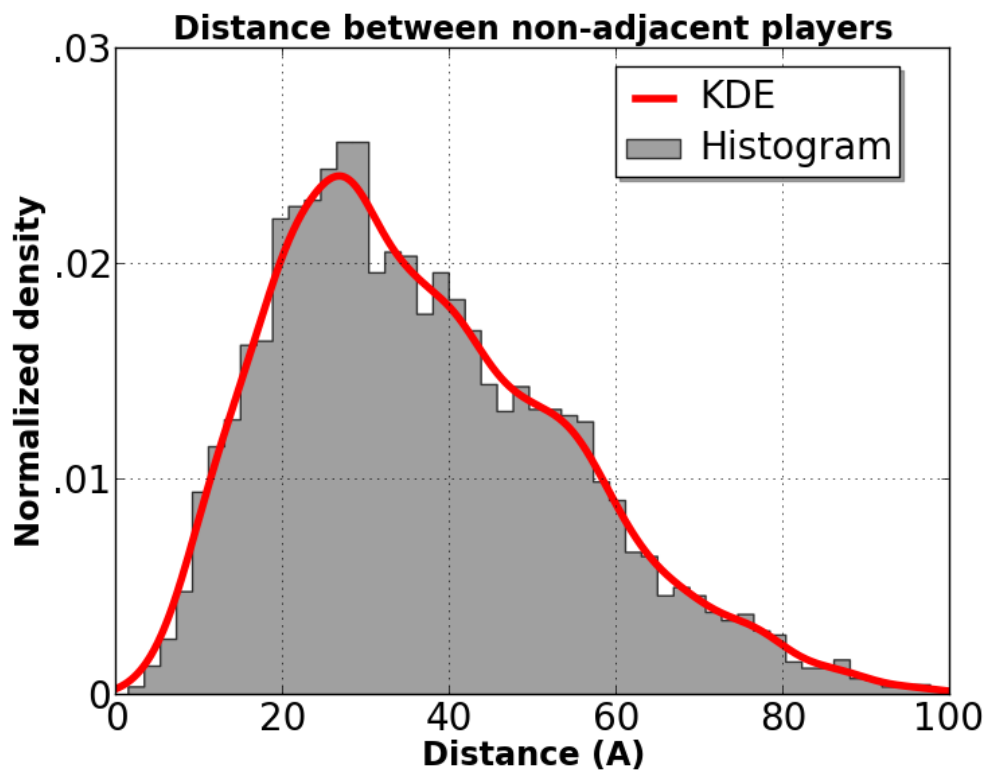

Figure S3: **Score distances.** Distances between all non-adjacent nodes for the *reference set*.
