# Supplementary material for: GARN: Sampling RNA 3D Structure Space with Game Theory and Knowledge-Based Scoring Strategies
Source: PubMed Central journal article supplement (PMC4551674; doi:10.1371/journal.pone.0136444), 2015-08-27
Supplement: pone.0136444.s004.pdf [file pone.0136444.s004.pdf]

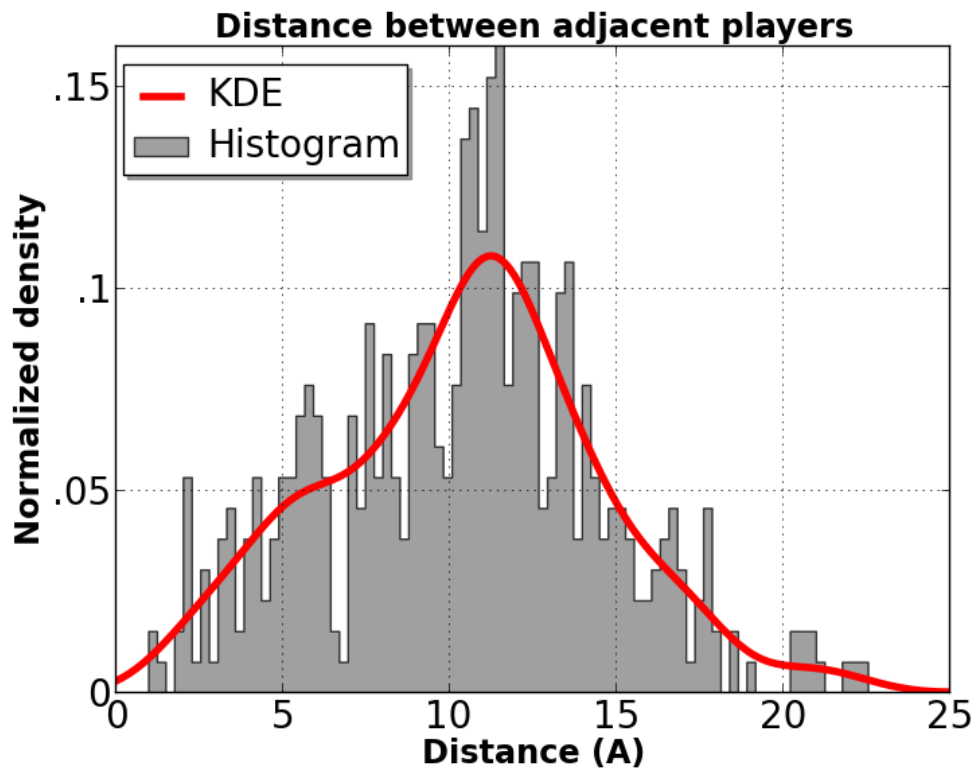

Figure S4: **Lattice distances.** Distances between adjacent nodes for all type of nodes, for the *reference set*.
