# Supplementary material for: GARN: Sampling RNA 3D Structure Space with Game Theory and Knowledge-Based Scoring Strategies
Source: PubMed Central journal article supplement (PMC4551674; doi:10.1371/journal.pone.0136444), 2015-08-27
Supplement: pone.0136444.s005.pdf [file pone.0136444.s005.pdf]

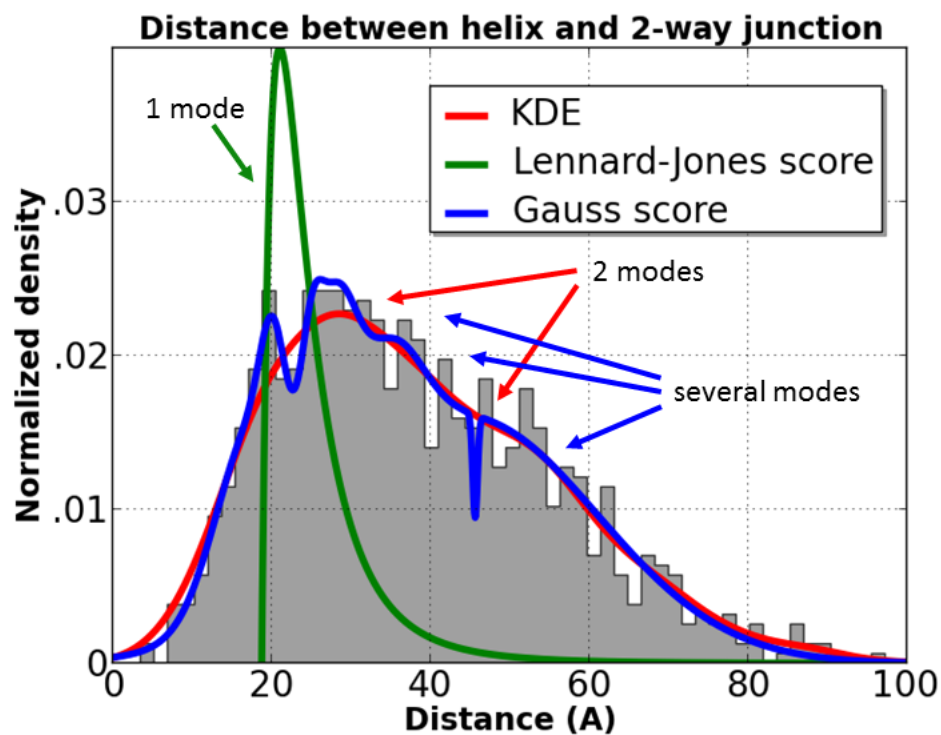

Figure S5: **Example of score.** Distances between helix and two-way junction players in the *reference set*. **Red:** Raw distances. **Green** Lennard-Jones score. **Blue** Gauss score. The Gauss score tries to fit the KDE, and the Lennard-Jones score tries to identify a global best distance.
