# Supplementary material for: GARN: Sampling RNA 3D Structure Space with Game Theory and Knowledge-Based Scoring Strategies
Source: PubMed Central journal article supplement (PMC4551674; doi:10.1371/journal.pone.0136444), 2015-08-27
Supplement: pone.0136444.s006.pdf [file pone.0136444.s006.pdf]

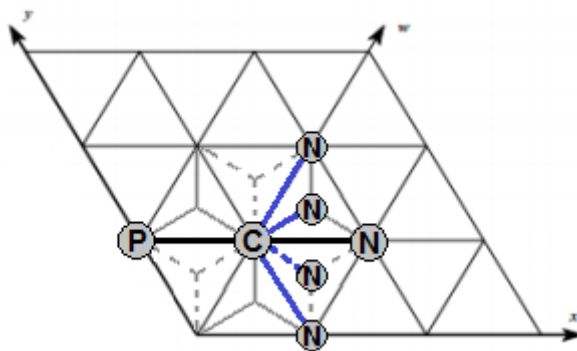

Figure S6: **Strategies on the lattice.** The current player, C, has to choose the direction of the next player, N, according to the direction of the previous player, P. If player C is frozen, this player can only choose the strategy corresponding to the black line; if not frozen, this player can choose to follow any of the blue lines.
