# Supplementary material for: GARN: Sampling RNA 3D Structure Space with Game Theory and Knowledge-Based Scoring Strategies
Source: PubMed Central journal article supplement (PMC4551674; doi:10.1371/journal.pone.0136444), 2015-08-27
Supplement: pone.0136444.s008.pdf [file pone.0136444.s008.pdf]

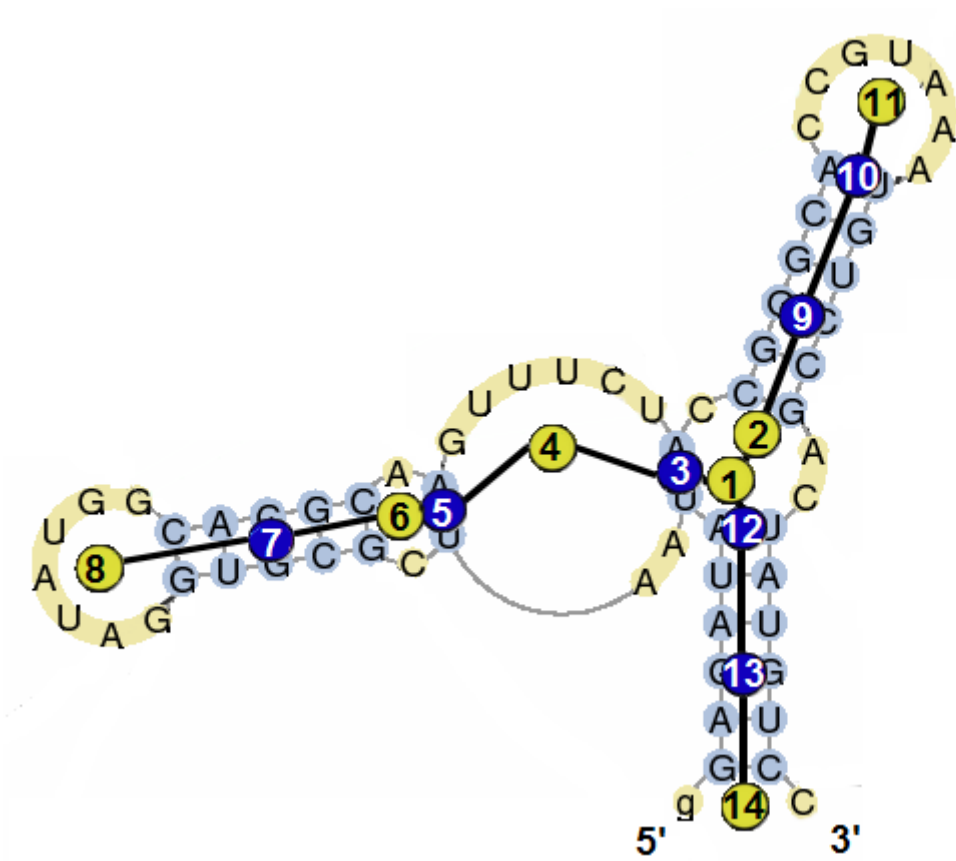

Figure S8: **Ordering of the players for the game.** Players from the largest junction play first, and the other players are numbered according to a depth first search, starting from the first largest junction according to 5'-3' ordering.
