# Supplementary material for: GARN: Sampling RNA 3D Structure Space with Game Theory and Knowledge-Based Scoring Strategies
Source: PubMed Central journal article supplement (PMC4551674; doi:10.1371/journal.pone.0136444), 2015-08-27
Supplement: pone.0136444.s010.pdf [file pone.0136444.s010.pdf]

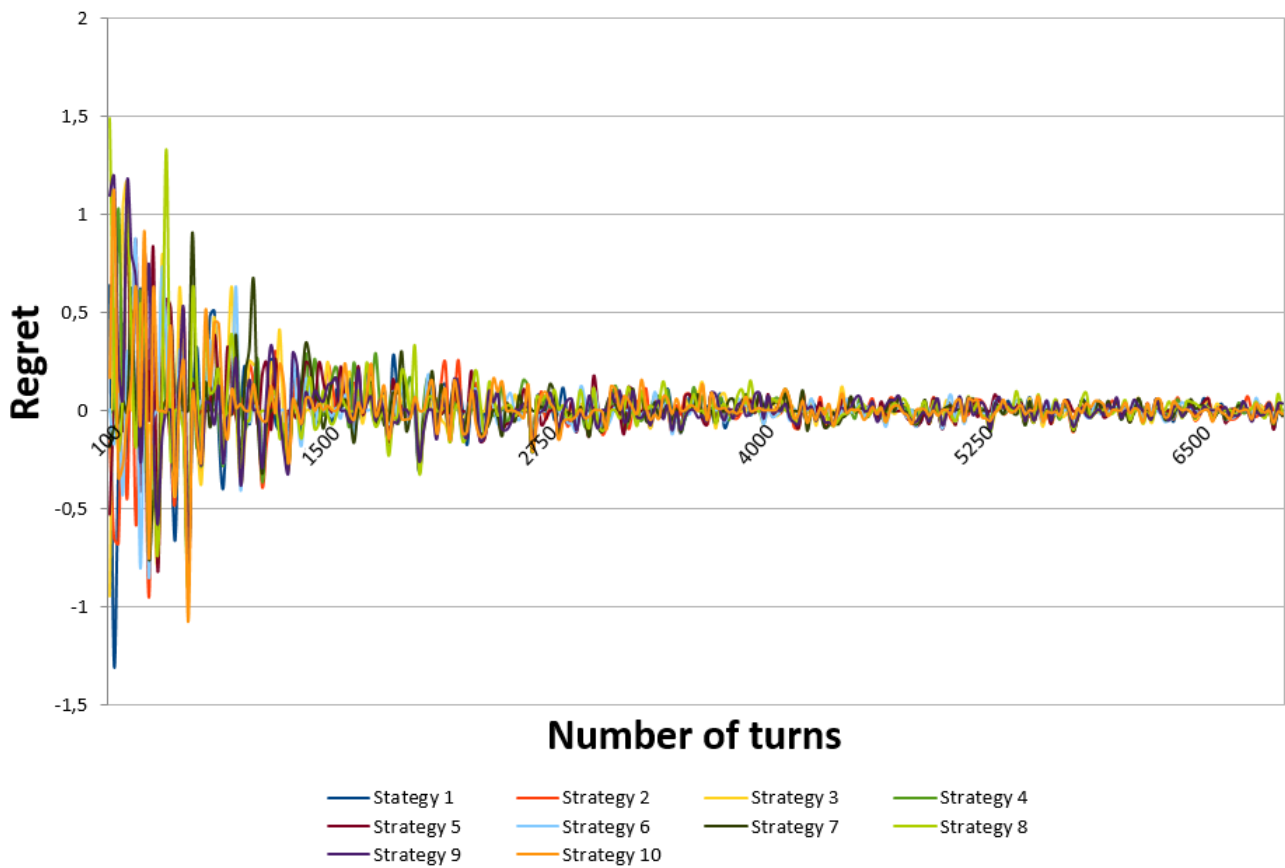

**Strategy 1**

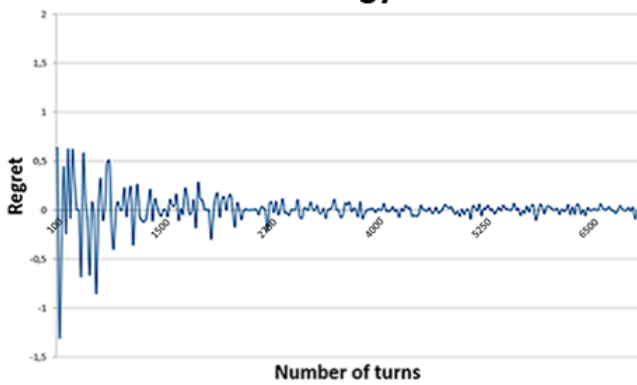

**Strategy 2**

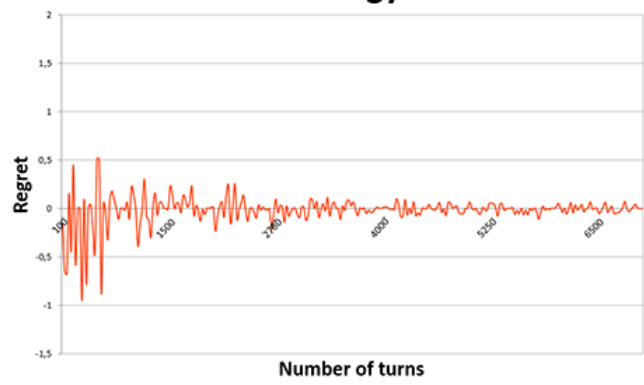

**Strategy 3**

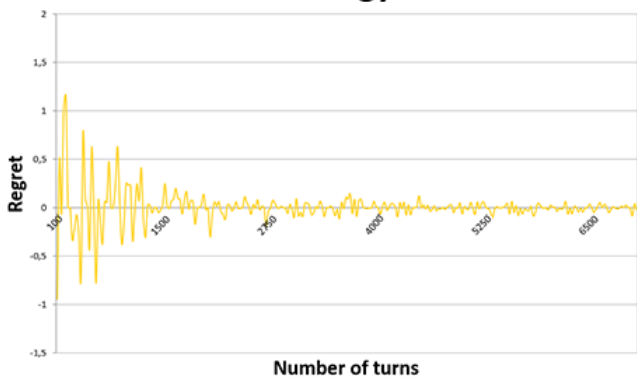

**Strategy 4**

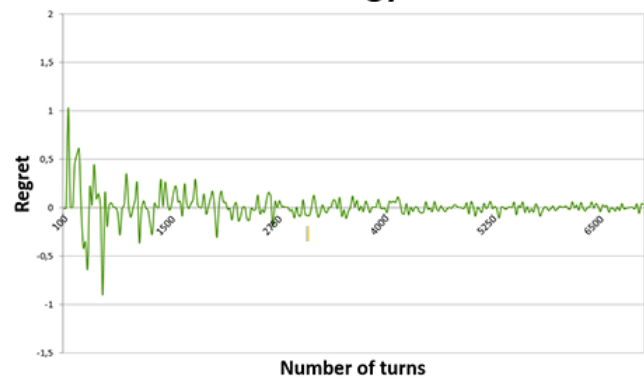

Figure S10: **Evolution of the regret.** Evolution of the regret for a three-way junction player during the 4FE5 simulation. The top panel shows all strategies and the bottom panel shows four strategies. After 4000 steps, the amplitude of regret reaches a stationary value.
