# Supplementary material for: GARN: Sampling RNA 3D Structure Space with Game Theory and Knowledge-Based Scoring Strategies
Source: PubMed Central journal article supplement (PMC4551674; doi:10.1371/journal.pone.0136444), 2015-08-27
Supplement: pone.0136444.s011.pdf [file pone.0136444.s011.pdf]

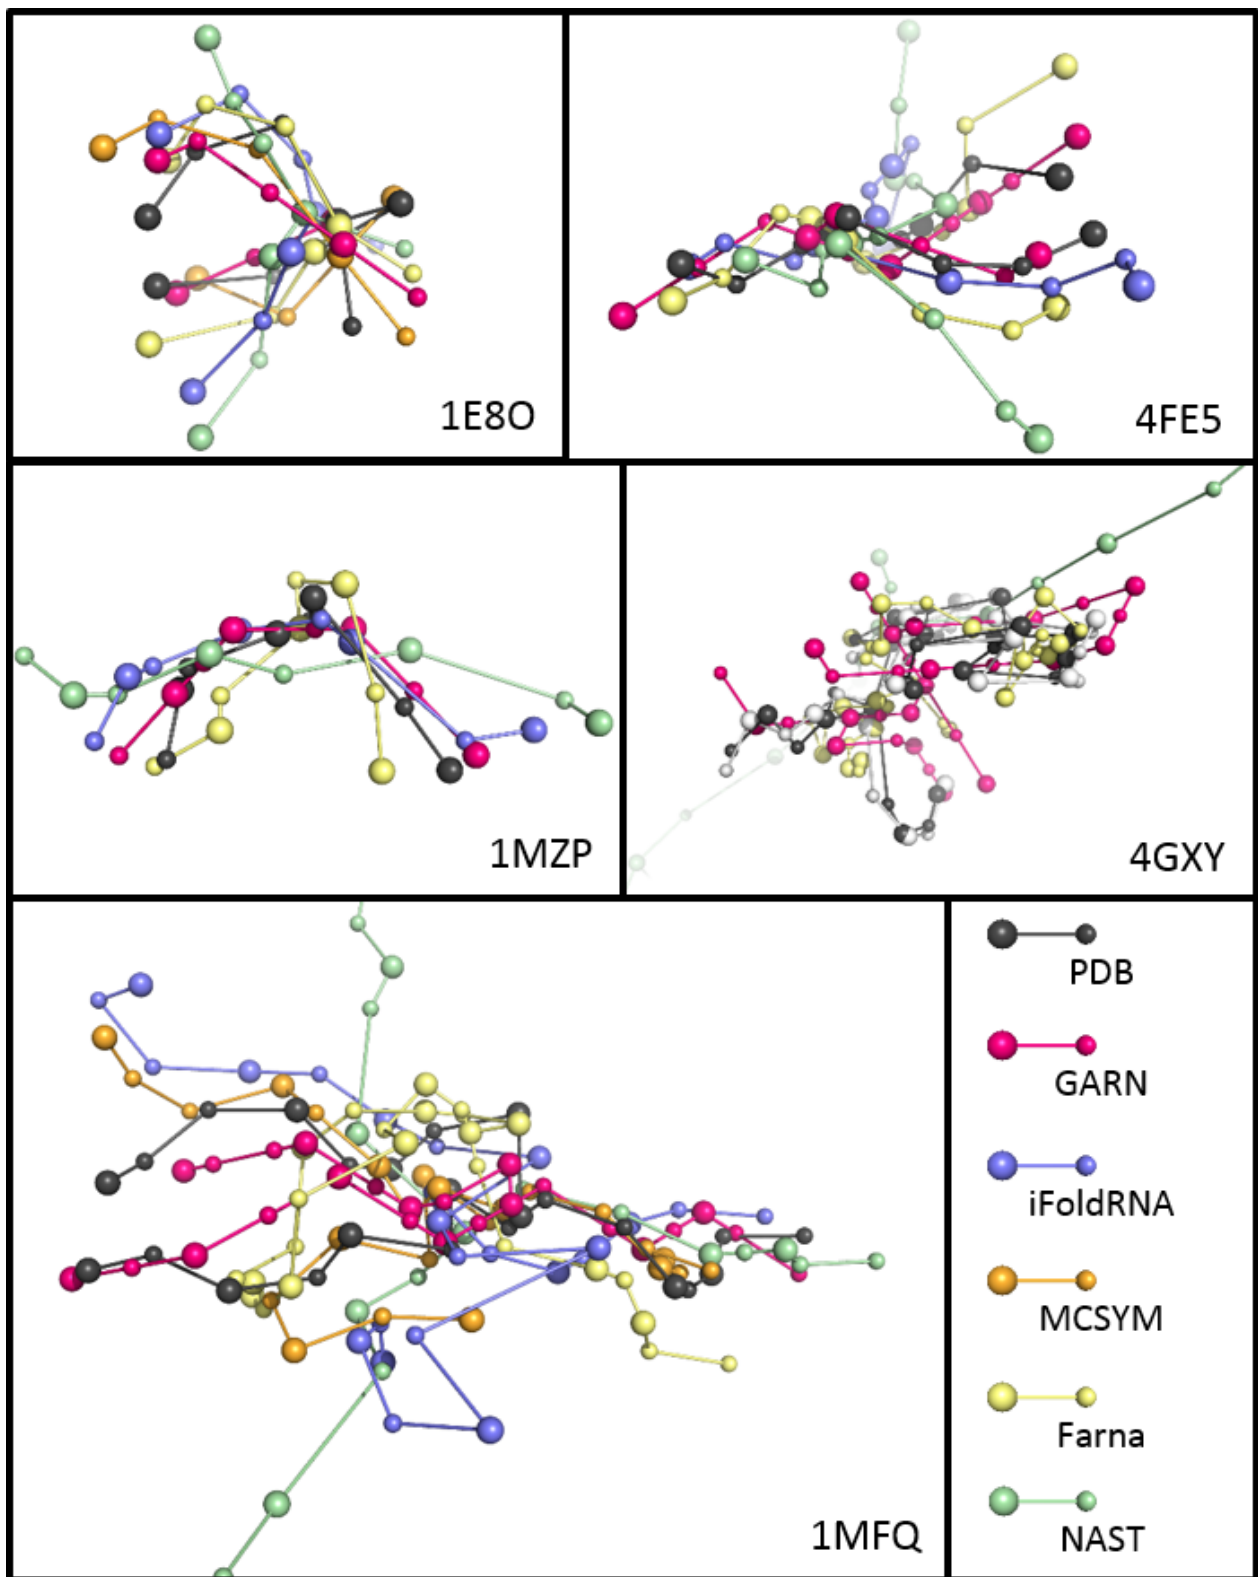

Figure S11: **Comparison with other methods for predicting RNA structure.** The best model generated by GARN (in pink) and the equivalent coarse-grained models obtained with other techniques (when available) are superimposed on the native structure graph (in black). The GARN technique does not enforce packing, but often provides the closest solution.
