# Supplementary material for: GARN: Sampling RNA 3D Structure Space with Game Theory and Knowledge-Based Scoring Strategies
Source: PubMed Central journal article supplement (PMC4551674; doi:10.1371/journal.pone.0136444), 2015-08-27
Supplement: pone.0136444.s012.pdf [file pone.0136444.s012.pdf]

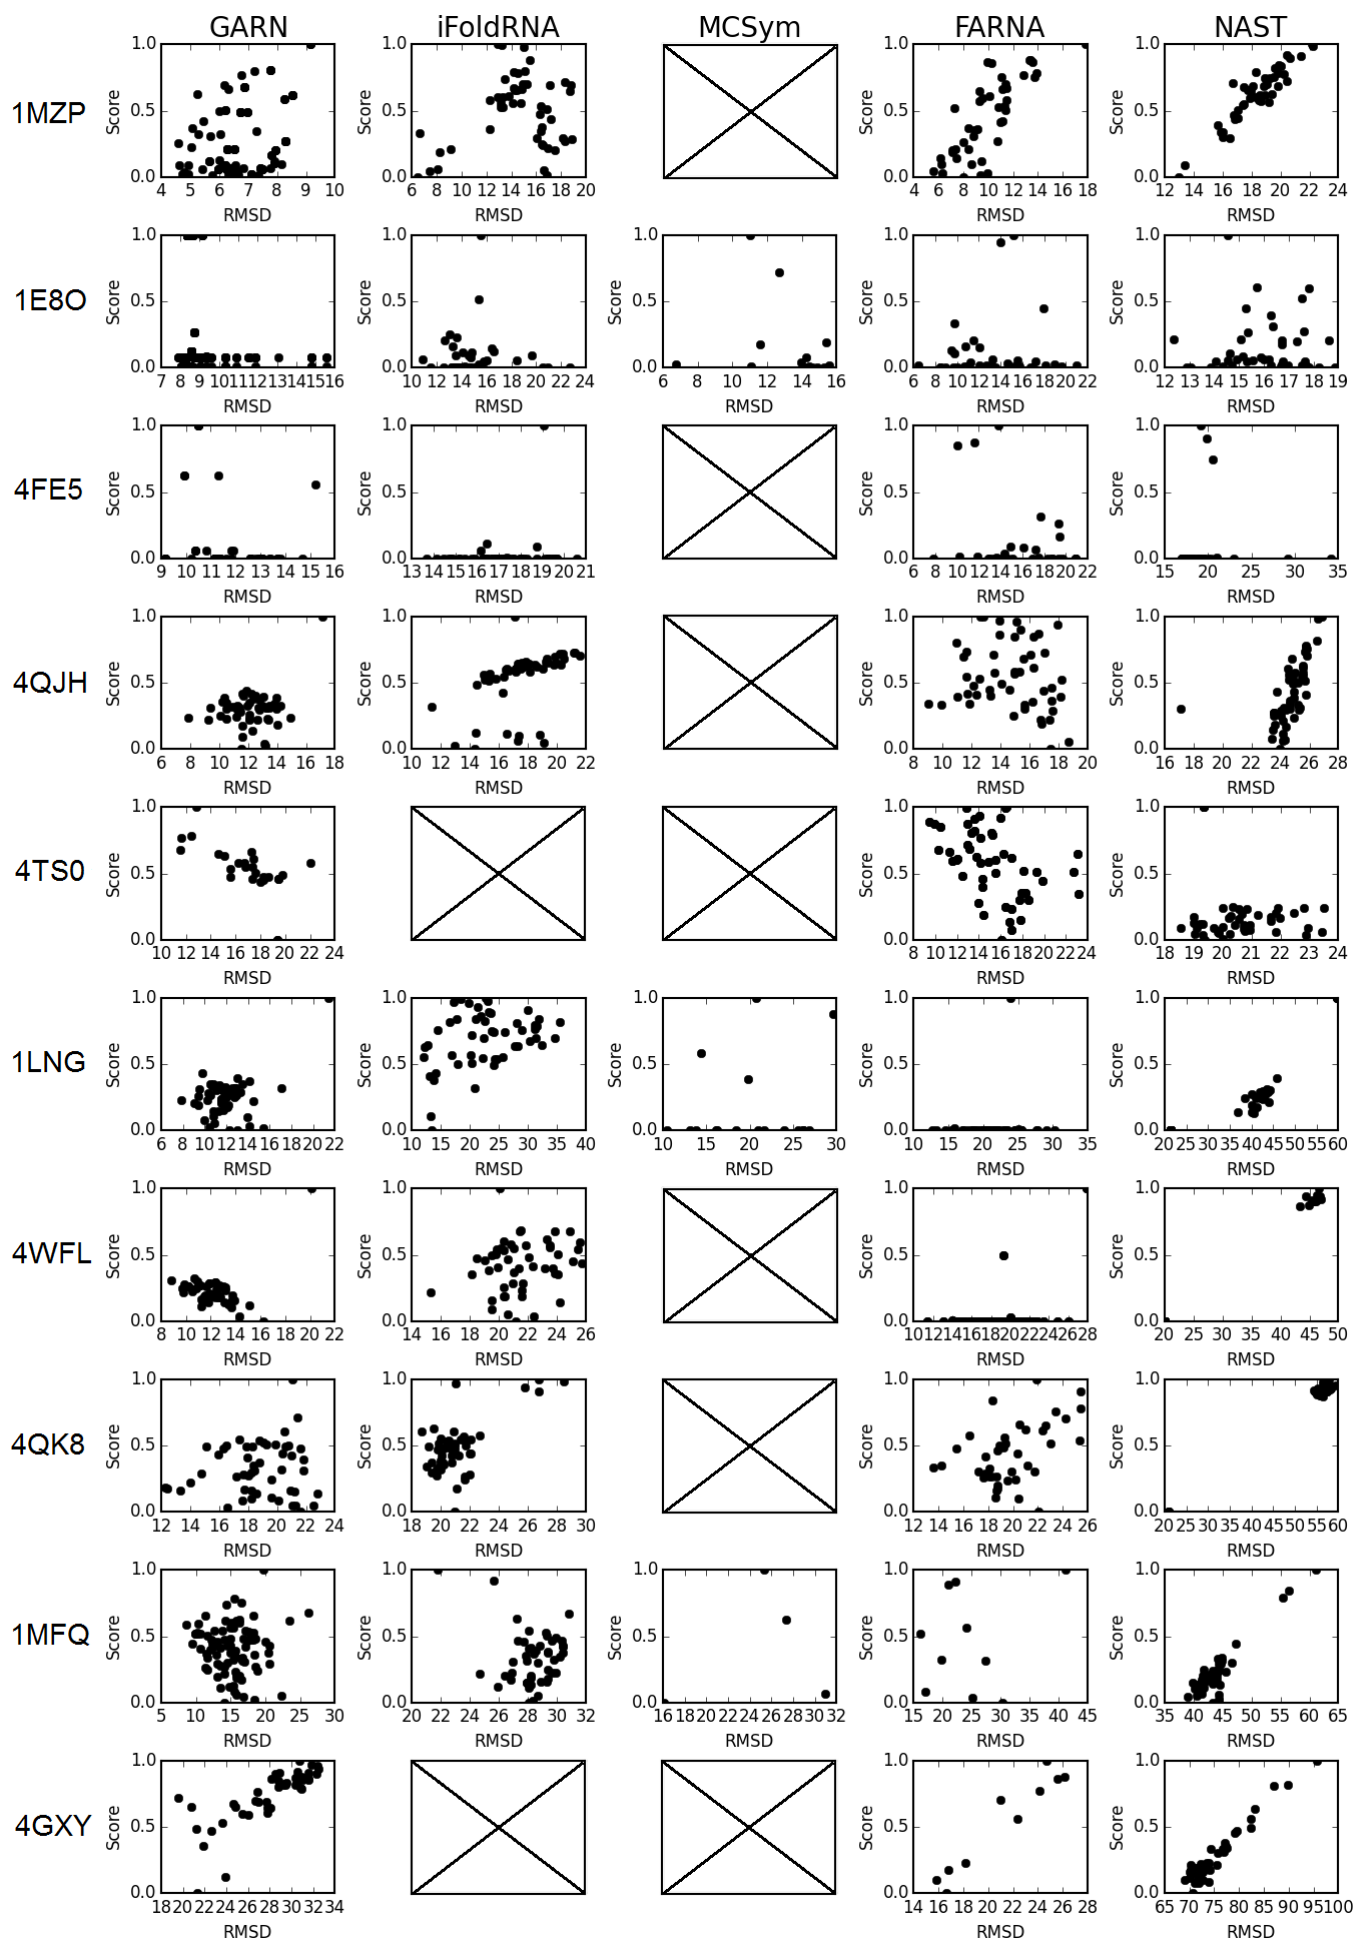

Figure S12: **Energy vs. RMSD curves for the *test set*.** Energy is calculated as the default GARN score multiplied by -1 and normalized.
