# Supplementary material for: GARN: Sampling RNA 3D Structure Space with Game Theory and Knowledge-Based Scoring Strategies
Source: PubMed Central journal article supplement (PMC4551674; doi:10.1371/journal.pone.0136444), 2015-08-27
Supplement: pone.0136444.s013.pdf [file pone.0136444.s013.pdf]

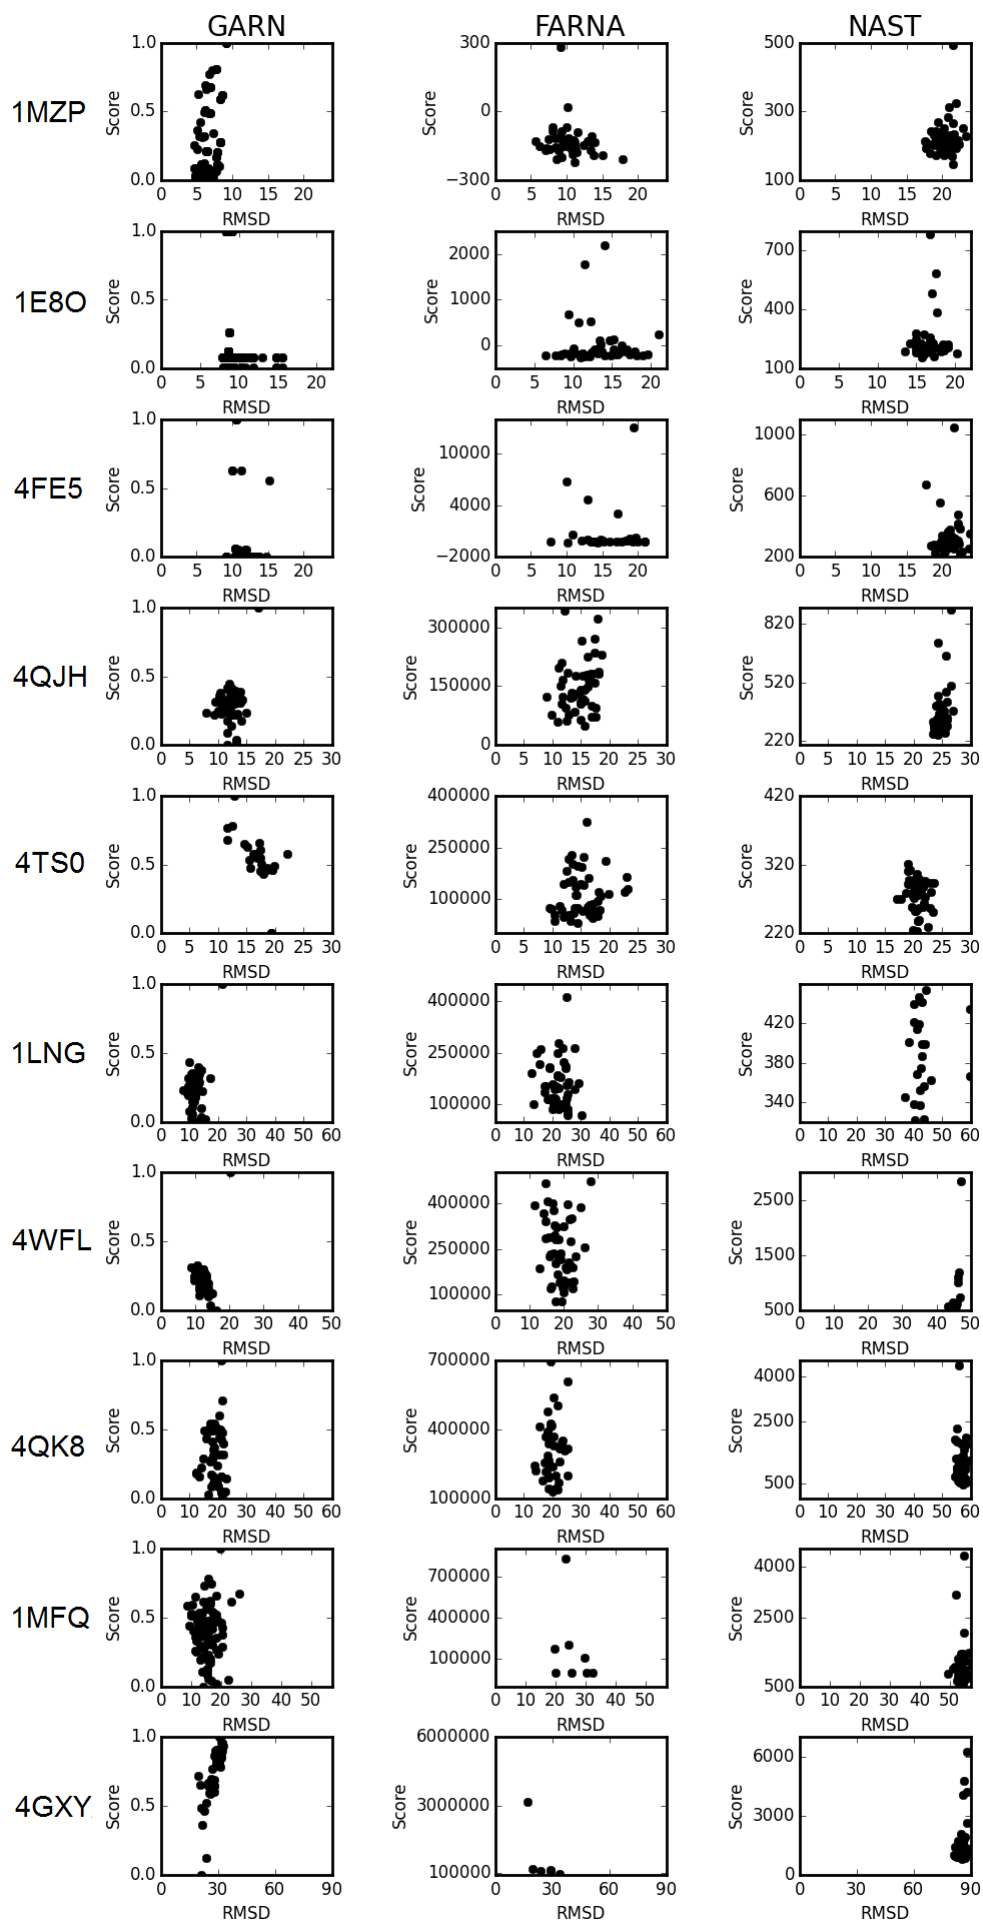

Figure S13: **Energy vs. RMSD curves for the *test set*.** Energy vs. RMSD curves for the *test set*. Each plot shows the default energy scheme for each technique.
