# Supplementary material for: GARN: Sampling RNA 3D Structure Space with Game Theory and Knowledge-Based Scoring Strategies
Source: PubMed Central journal article supplement (PMC4551674; doi:10.1371/journal.pone.0136444), 2015-08-27
Supplement: pone.0136444.s014.pdf [file pone.0136444.s014.pdf]

| <b>PDB ID</b> | <b>Description</b>                                               | <b>Biological Family</b> | <b>Excluding reason</b> |
|---------------|------------------------------------------------------------------|--------------------------|-------------------------|
| 1DQF          | 5S rRNA                                                          | Ribosomal RNA            |                         |
| 1MSY          | Sarcin/Ricin domain from 23s RNA                                 | Ribosomal RNA            |                         |
| 1Q93          | Sarcin/Ricin domain mutant from 28s RNA                          | Ribosomal RNA            |                         |
| 1T0D          | Ribosomal decoding site                                          | Ribosomal RNA            |                         |
| 1T0E          | Ribosomal decoding site                                          | Ribosomal RNA            |                         |
| 2OE6          | Ribosomal decoding A site                                        | Ribosomal RNA            |                         |
| 357D          | 5S rRNA                                                          | Ribosomal RNA            |                         |
| 1SDR          | Shine-Dalgarno region of 16S rRNA                                | Ribosomal RNA            | Too small               |
| 353D          | 5S rRNA                                                          | Ribosomal RNA            | Too small               |
| 361D          | 5S rRNA                                                          | Ribosomal RNA            | Too small               |
| 1MME          | Hammerhead ribozyme                                              | Ribozymes                |                         |
| 1NUJ          | Leadzyme                                                         | Ribozymes                |                         |
| 1NBS          | Ribonuclease P RNA                                               | Ribozymes                | 4-way or more           |
| 1U9S          | Ribonuclease P RNA                                               | Ribozymes                | 4-way or more           |
| 1X9C          | Hairpin Ribozyme                                                 | Ribozymes                | 4-way or more           |
| 1X9K          | Hairpin Ribozyme                                                 | Ribozymes                | 4-way or more           |
| 1Y0Q          | Group I ribozyme                                                 | Ribozymes                | 4-way or more           |
| 2A2E          | Ribonuclease P RNA                                               | Ribozymes                | 4-way or more           |
| 2A64          | Ribonuclease P RNA                                               | Ribozymes                | 4-way or more           |
| 1X8W          | Tetrahymena ribozyme                                             | Ribozymes                | Unpaired ends           |
| 1YKQ          | Diels-Alder Ribozyme                                             | Ribozymes                | Unpaired ends           |
| 2H0S          | glmS ribozyme                                                    | Ribozymes                | Unpaired ends           |
| 1D4R          | Human SRP helix 6                                                | SRP RNAs                 |                         |
| 1DUH          | 4.5s RNA                                                         | SRP RNAs                 |                         |
| 1FIR          | HIV reverse-transcription primer tRNA(Lys,3)                     | Transfer RNAs            | 4-way or more           |
| 1I9V          | Phenylalanine tRNA                                               | Transfer RNAs            | 4-way or more           |
| 1YFG          | Yeast initiator tRNA                                             | Transfer RNAs            | 4-way or more           |
| 2TRA          | Yeast aspartic acid tRNA                                         | Transfer RNAs            | Too small               |
| 434D          | acceptor stem of tRNA(Ala) from Escherichia coli                 | Transfer RNAs            | Too small               |
| 1CSL          | HIV-1 rev binding site                                           | Viral RNAs               |                         |
| 1DUQ          | HIV-1 rev binding site                                           | Viral RNAs               |                         |
| 1JZV          | Bulged RNA from the SL2 stem-loop of the HIV-1 psi-RNA           | Viral RNAs               |                         |
| 1XJR          | SARS virus genome stem-loop II motif (s2m)                       | Viral RNAs               |                         |
| 2NOK          | IRES domain from hepatitis C virus                               | Viral RNAs               |                         |
| 397D          | HIV-1 trans-activation response region RNA stem                  | Viral RNAs               |                         |
| 1KH6          | RNA domain essential to HCV IRES-mediated translation initiation | Viral RNAs               | 4-way or more           |
| 1K9W          | HIV-1 RNA dimerization initiation site                           | Viral RNAs               | Too small               |
| 1L2X          | Viral (beet western yellow virus) rna pseudoknot                 | Viral RNAs               | Too small               |
| 2B8R          | HIV-1 RNA dimerization initiation site                           | Viral RNAs               | Too small               |
| 2IL9          | Ribosomal Binding Domain of the IRES RNA                         | Viral RNAs               | Unpaired ends           |
| 157D          | RNA duplex                                                       | Other RNA                |                         |
| 1F1T          | RNA duplex                                                       | Other RNA                |                         |
| 1I9X          | snRNA                                                            | Other RNA                |                         |
| 1J9H          | RNA nonamer                                                      | Other RNA                |                         |
| 1KD5          | RNA duplex                                                       | Other RNA                |                         |
| 1KXK          | Ai5gamma group II self-splicing intron                           | Other RNA                |                         |
| 1QBP          | RNA duplex                                                       | Other RNA                |                         |
| 1SA9          | RNA octamer                                                      | Other RNA                |                         |
| 1Z43          | SRP19 RNA                                                        | Other RNA                |                         |
| 205D          | RNA duplex                                                       | Other RNA                |                         |
| 255D          | RNA duplex                                                       | Other RNA                |                         |
| 280D          | RNA duplex                                                       | Other RNA                |                         |
| 333D          | RNA octamer                                                      | Other RNA                |                         |
| 387D          | RNA pseudoknot with 3d domain swapping (inhibit HIVRT)           | Other RNA                |                         |
| 402D          | RNA octamer                                                      | Other RNA                |                         |
| 405D          | RNA duplex                                                       | Other RNA                |                         |
| 406D          | RNA duplex                                                       | Other RNA                |                         |
| 409D          | RNA octamer                                                      | Other RNA                |                         |
| 413D          | RNA duplex                                                       | Other RNA                |                         |
| 1F27          | RNA pseudoknot                                                   | Other RNA                | Too small               |
| 1G2J          | RNA duplex containing phenyl-ribonucleotides                     | Other RNA                | Too small               |
| 1KFO          | RNA duplex                                                       | Other RNA                | Too small               |
| 1L3Z          | RNA heptamer                                                     | Other RNA                | Too small               |

| <b>PDB ID</b> | <b>Description</b>                                | <b>Biological Family</b> | <b>Excluding reason</b> |
|---------------|---------------------------------------------------|--------------------------|-------------------------|
| 1MHK          | 26-nucleotide RNA containing a hook-turn          | Other RNA                | Too small               |
| 1P79          | Bulged RNA tetraplex                              | Other RNA                | Too small               |
| 1YZD          | RNA duplex                                        | Other RNA                | Too small               |
| 259D          | RNA octamer                                       | Other RNA                | Too small               |
| 2A0P          | RNA octamer                                       | Other RNA                | Too small               |
| 2A05          | RNA duplex                                        | Other RNA                | Too small               |
| 2G32          | RNA octamer                                       | Other RNA                | Too small               |
| 2G3S          | RNA octamer                                       | Other RNA                | Too small               |
| 2G91          | RNA octamer                                       | Other RNA                | Too small               |
| 377D          | Alternating A-RNA hexamer                         | Other RNA                | Too small               |
| 433D          | RNA duplex                                        | Other RNA                | Too small               |
| 438D          | RNA nonamer                                       | Other RNA                | Too small               |
| 472D          | Octamer RNA with G.G/U.U tandem wobble base pairs | Other RNA                | Too small               |

Table ST1: **Reference Set.** The *reference set* contains 76 molecules of different sizes.
