# Supplementary material for: GARN: Sampling RNA 3D Structure Space with Game Theory and Knowledge-Based Scoring Strategies
Source: PubMed Central journal article supplement (PMC4551674; doi:10.1371/journal.pone.0136444), 2015-08-27
Supplement: pone.0136444.s015.pdf [file pone.0136444.s015.pdf]

| PDB ID | # Nucleotides | # Players | GARN        |       | MCSYM       |       | Farna       |       | NAST        |       |
|--------|---------------|-----------|-------------|-------|-------------|-------|-------------|-------|-------------|-------|
|        |               |           | Min         | Max   | Min         | Max   | Min         | Max   | Min         | Max   |
| 1SA9   | 16            | 3         | 3.97        | 3.97  | 0.67        | 3.31  | <b>0.24</b> | 4.22  | 0.34        | 2.24  |
| 333D   | 16            | 3         | 3.81        | 3.81  | <b>0.34</b> | 3.57  | 0.48        | 3.3   | 0.36        | 2.48  |
| 402D   | 16            | 3         | 4.15        | 4.15  | <b>0.14</b> | 4.7   | 0.29        | 3.81  | NA          | NA    |
| 409D   | 16            | 3         | 3.93        | 3.93  | 0.49        | 2.95  | <b>0.31</b> | 4.09  | 0.56        | 2.30  |
| 1JZV   | 17            | 3         | 4.3         | 9.24  | <b>0.15</b> | 3.94  | 0.82        | 6.11  | 2.51        | 4.86  |
| 1J9H   | 18            | 5         | 4.56        | 11.53 | <b>1.14</b> | 4.2   | 1.76        | 6.77  | 2.84        | 4.91  |
| 1DQF   | 19            | 4         | 5.39        | 5.39  | <b>0.84</b> | 3.49  | 1.46        | 8.58  | NA          | NA    |
| 1KD5   | 22            | 5         | 9.54        | 9.54  | NA          | NA    | <b>1.56</b> | 12.68 | 1.81        | 5.71  |
| 205D   | 24            | 3         | 4.79        | 4.79  | <b>0.22</b> | 4.62  | 0.24        | 5.1   | 0.26        | 2.70  |
| 255D   | 24            | 3         | 5.4         | 5.4   | 0.66        | 3.86  | <b>0.21</b> | 6.07  | 0.32        | 3.14  |
| 280D   | 24            | 3         | 4.36        | 4.36  | <b>0.22</b> | 5.22  | 0.28        | 6.09  | <b>0.22</b> | 2.10  |
| 157D   | 24            | 5         | 2.17        | 12.94 | <b>0.66</b> | 3.31  | 0.77        | 7.66  | 1.11        | 4.68  |
| 1NUJ   | 24            | 5         | 7.07        | 7.07  | NA          | NA    | <b>1.62</b> | 10.48 | 2.07        | 6.01  |
| 1DUQ   | 26            | 5         | 4.86        | 6.16  | <b>0.66</b> | 7.24  | 2.41        | 9.03  | NA          | NA    |
| 1I9X   | 26            | 5         | 6.74        | 8.35  | <b>1.82</b> | 5.52  | 3.26        | 9.25  | 4.37        | 9.64  |
| 387D   | 26            | 5         | 7.69        | 7.69  | NA          | NA    | 3.95        | 9.96  | <b>3.63</b> | 7.88  |
| 413D   | 26            | 5         | 8.44        | 8.44  | NA          | NA    | <b>1.17</b> | 13.29 | 4.23        | 6.62  |
| 1Q93   | 27            | 4         | 7.66        | 7.66  | NA          | NA    | 0.98        | 9.64  | <b>0.90</b> | 5.85  |
| 1MSY   | 27            | 5         | 4.71        | 10.06 | NA          | NA    | <b>1.27</b> | 8.3   | 1.58        | 5.54  |
| 397D   | 27            | 6         | 4.09        | 10.16 | NA          | NA    | <b>2.32</b> | 8.73  | 3.15        | 6.04  |
| 1QBP   | 28            | 5         | 4.2         | 8.98  | <b>1.02</b> | 6.35  | 1.99        | 8.3   | 2.07        | 4.97  |
| 1CSL   | 28            | 7         | 3.86        | 9.69  | NA          | NA    | <b>2.96</b> | 11.99 | 5.86        | 8.84  |
| 405D   | 32            | 5         | 2.43        | 4.73  | <b>0.62</b> | 2.64  | 1.18        | 8.5   | 3.42        | 6.63  |
| 1T0D   | 33            | 8         | <b>3.14</b> | 13.87 | NA          | NA    | NA          | NA    | 3.67        | 7.06  |
| 2OE6   | 33            | 8         | 4.77        | 14.12 | NA          | NA    | NA          | NA    | <b>4.67</b> | 7.33  |
| 406D   | 34            | 5         | 3.47        | 9.7   | NA          | NA    | NA          | NA    | <b>3.13</b> | 4.87  |
| 1T0E   | 35            | 9         | <b>3.53</b> | 14.66 | NA          | NA    | NA          | NA    | 3.97        | 6.49  |
| 1F1T   | 38            | 7         | 3.68        | 9.37  | <b>2.17</b> | 6.86  | NA          | NA    | 4.17        | 7.48  |
| 1KFO   | 38            | 11        | 6.39        | 14.91 | NA          | NA    | NA          | NA    | <b>5.99</b> | 10.72 |
| 1MME   | 41            | 8         | <b>5.76</b> | 10.44 | NA          | NA    | NA          | NA    | NA          | NA    |
| 2NOK   | 44            | 12        | <b>4.88</b> | 16.77 | NA          | NA    | NA          | NA    | 6.48        | 10.65 |
| 1XJR   | 47            | 12        | 6.23        | 13.16 | 5.48        | 10.82 | NA          | NA    | <b>5.44</b> | 9.33  |
| 1D4R   | 57            | 10        | 8.07        | 21.61 | NA          | NA    | NA          | NA    | <b>4.17</b> | 9.03  |
| 357D   | 60            | 8         | 12.17       | 25.42 | 5.27        | 23.23 | NA          | NA    | <b>3.28</b> | 10.85 |
| 1KXK   | 70            | 10        | 8.35        | 21.28 | <b>5.06</b> | 12.07 | NA          | NA    | 6.80        | 14.00 |
| 1DUH   | 90            | 13        | <b>8.63</b> | 33.33 | NA          | NA    | NA          | NA    | NA          | NA    |
| 1Z43   | 101           | 18        | <b>8.98</b> | 15.54 | NA          | NA    | NA          | NA    | 31.24       | 55.70 |

Table ST2: **Comparison of RMSD values.** Comparison of the RMSD ranges obtained for different methods with the *evaluation set*. Minimum values of RMSD for each example are shown in blue.
