# Supplementary material for: GARN: Sampling RNA 3D Structure Space with Game Theory and Knowledge-Based Scoring Strategies
Source: PubMed Central journal article supplement (PMC4551674; doi:10.1371/journal.pone.0136444), 2015-08-27
Supplement: pone.0136444.s016.pdf [file pone.0136444.s016.pdf]

| PDB ID | Description                       | # Nucleotides | # of 3- and 4-way junctions |
|--------|-----------------------------------|---------------|-----------------------------|
| 1E8O   | 7SL RNA                           | 49            | One 3-way                   |
| 1MZP   | Fragment of 23S rRNA              | 55            | None                        |
| 4FE5   | Guanine riboswitch aptamer domain | 67            | One 3-way                   |
| 4QJH   | Twister Ribozyme                  | 74            | One 3-way                   |
| 4TS0   | Spinach RNA aptamer               | 89            | None                        |
| 1LNG   | 7S.S SRP RNA                      | 97            | One 3-way                   |
| 4WFL   | Bacterial SRP Alu domain          | 107           | Two 3-way                   |
| 4QK8   | C-di-AMP riboswitch               | 124           | Two 3-way                   |
| 1MFQ   | 7S RNA of human SRP               | 127           | One 3-way                   |
| 4GXY   | Adenosylcobalamin riboswitch      | 172           | One 4-way and one 3-way     |

Table ST3: **Test set.** The *test set* contains 10 molecules of different sizes.
