# Supplementary material for: GARN: Sampling RNA 3D Structure Space with Game Theory and Knowledge-Based Scoring Strategies
Source: PubMed Central journal article supplement (PMC4551674; doi:10.1371/journal.pone.0136444), 2015-08-27
Supplement: pone.0136444.s017.pdf [file pone.0136444.s017.pdf]

| Score                  | Frozen    | Algorithm   | Game      | # conformations<br>w/ RMSD <10 Å | RMSD range        |            |
|------------------------|-----------|-------------|-----------|----------------------------------|-------------------|------------|
| <b>Lennard-Jones</b>   | <b>No</b> | <b>EXP3</b> | <b>AA</b> | <b>2</b>                         | <b>6.82-15.40</b> |            |
|                        |           |             | OA        | 0                                | 12.1-15.65        |            |
|                        |           |             | OO        | 3                                | 7.96-12           |            |
|                        |           |             | UCB       | AA                               | 1                 | 8.1-12.8   |
|                        |           |             | OA        | 1                                | 8.91-11.71        |            |
|                        |           |             | OO        | 0                                | 11.9-12.42        |            |
|                        | Yes       | EXP3        | AA        | 3                                | 8.75-12.36        |            |
|                        |           |             | OA        | 3                                | 7.7-12.4          |            |
|                        |           |             | OO        | 3                                | 8.89-11.9         |            |
|                        |           |             | UCB       | AA                               | 2                 | 8.41-12.02 |
| OA                     |           |             | 1         | 8.67-12.69                       |                   |            |
|                        |           | OO          | 2         | 8.89-12.92                       |                   |            |
| Modified Lennard-Jones | No        | EXP3        | AA        | 3                                | 8.75-12           |            |
|                        |           |             | OA        | 3                                | 8.26-11.6         |            |
|                        |           |             | OO        | 3                                | 8.01-11.1         |            |
|                        |           |             | UCB       | AA                               | 2                 | 8.26-15.21 |
|                        |           |             | OA        | 1                                | 8.14-14.9         |            |
|                        |           |             | OO        | 0                                | 11.9-11.9         |            |
|                        | Yes       | EXP3        | AA        | 3                                | 8.75-12.36        |            |
|                        |           |             | OA        | 4                                | 7.71-9.33         |            |
|                        |           |             | OO        | 4                                | 8.75-9.33         |            |
|                        |           |             | UCB       | AA                               | 2                 | 8.26-15.53 |
| OA                     |           |             | 1         | 8.64-16.2                        |                   |            |
|                        |           | OO          | 0         | 11.65-12.92                      |                   |            |
| Gauss                  | No        | EXP3        | AA        | 4                                | 8.19-9.34         |            |
|                        |           |             | OA        | 3                                | 8.41-12.92        |            |
|                        |           |             | OO        | 2                                | 8.19-15.2         |            |
|                        |           |             | UCB       | AA                               | 2                 | 8.41-11.88 |
|                        |           |             | OA        | 2                                | 8.37-10.88        |            |
|                        | Yes       | EXP3        | OO        | 0                                | 11.9-11.9         |            |
|                        |           |             | AA        | 4                                | 8.75-9.34         |            |
|                        |           |             | OA        | 1                                | 8.9-11.88         |            |
|                        |           |             | OO        | 1                                | 8.75-12.92        |            |
|                        |           |             | UCB       | AA                               | 1                 | 8.41-15.53 |
|                        |           | OA          | 4         | 8.41-8.93                        |                   |            |
|                        |           | OO          | 2         | 8.31-12.92                       |                   |            |
| 1/d <sup>2</sup>       | No        | EXP3        | AA        | 3                                | 8.51-10.64        |            |
|                        |           |             | OA        | 2                                | 7.38-14.9         |            |
|                        |           |             | OO        | 2                                | 8.89-12.3         |            |
|                        |           |             | UCB       | AA                               | 4                 | 8.08-9.81  |
|                        |           |             | OA        | 4                                | 6.66-8.72         |            |
|                        |           |             | OO        | 2                                | 8.81-11.9         |            |
|                        | Yes       | EXP3        | AA        | 4                                | 8.19-9.33         |            |
|                        |           |             | OA        | 1                                | 8.64-11.6         |            |
|                        |           |             | OO        | 2                                | 8.26-16.2         |            |
|                        |           |             | UCB       | AA                               | 3                 | 7.44-10    |
| OA                     |           |             | 3         | 8.64-14.92                       |                   |            |
|                        |           | OO          | 1         | 9.75-12.92                       |                   |            |

Table ST4: **Sampling results for the structure of the core of the ALU domain of the mammalian SRP (PDB ID 1E8O).** The molecule contains 49 nucleotides and 8 players. Six different parameter sets per game type are shown. Values shown in blue highlight combinations providing conformations with RMSD values below 8Å. Elements highlighted in yellow correspond to the default GARN options for the molecule.
