# Supplementary material for: GARN: Sampling RNA 3D Structure Space with Game Theory and Knowledge-Based Scoring Strategies
Source: PubMed Central journal article supplement (PMC4551674; doi:10.1371/journal.pone.0136444), 2015-08-27
Supplement: pone.0136444.s018.pdf [file pone.0136444.s018.pdf]

| Score                         | Frozen | Algorithm  | Game      | # conformations<br>w/ RMSD <7 Å | RMSD range |
|-------------------------------|--------|------------|-----------|---------------------------------|------------|
| Lennard-Jones                 | No     | EXP3       | AA        | 1                               | 6.84-11.62 |
|                               |        |            | OA        | 6                               | 4.61-11.67 |
|                               |        |            | OO        | 7                               | 4.71-11.23 |
|                               |        | UCB        | AA        | 5                               | 5.24-11.23 |
|                               |        |            | OA        | 10                              | 4.46-9.31  |
|                               |        |            | OO        | 12                              | 7.64-16.6  |
| Yes                           | EXP3   | AA         | 2         | 6.84-11.17                      |            |
|                               |        | OA         | 11        | 4.91-8.07                       |            |
|                               |        | OO         | 9         | 4.22-9.58                       |            |
|                               | UCB    | AA         | 10        | 4.32-11.37                      |            |
|                               |        | OA         | 8         | 4.27-10.12                      |            |
|                               |        | OO         | 10        | 6.41-15.68                      |            |
| <b>Modified Lennard-Jones</b> | No     | EXP3       | AA        | 3                               | 5.43-11.85 |
|                               |        |            | OA        | 7                               | 5.25-8.72  |
|                               |        |            | OO        | 13                              | 4.46-8.68  |
|                               |        | UCB        | AA        | 12                              | 4.32-8.86  |
|                               |        |            | OA        | 12                              | 4.4-9.38   |
|                               |        |            | OO        | 6                               | 4.27-11.23 |
| <b>Yes</b>                    | EXP3   | AA         | 4         | 5.92-10.07                      |            |
|                               |        | OA         | 13        | 4.43-8.5                        |            |
|                               |        | OO         | 10        | 5.25-9.72                       |            |
|                               |        | <b>UCB</b> | AA        | 17                              | 4.3-7.26   |
|                               |        | <b>OA</b>  | <b>11</b> | <b>4.32-10.58</b>               |            |
|                               |        | OO         | 6         | 4.32-11.85                      |            |
| Gauss                         | No     | EXP3       | AA        | 6                               | 5.21-10.07 |
|                               |        |            | OA        | 12                              | 5.72-8.98  |
|                               |        |            | OO        | 8                               | 5.34-9.72  |
|                               |        | UCB        | AA        | 8                               | 4.3-11.85  |
|                               |        |            | OA        | 5                               | 5.68-11.72 |
|                               |        |            | OO        | 10                              | 4.88-9.58  |
| Yes                           | EXP3   | AA         | 6         | 8.49-16.92                      |            |
|                               |        | OA         | 10        | 4.61-9.47                       |            |
|                               |        | OO         | 9         | 4.46-10.07                      |            |
|                               | UCB    | AA         | 4         | 4.95-10.62                      |            |
|                               |        | OA         | 5         | 4.81-11.08                      |            |
|                               |        | OO         | 15        | 4.3-9.72                        |            |
| 1/d <sup>2</sup>              | No     | EXP3       | AA        | 6                               | 5.69-10.07 |
|                               |        |            | OA        | 1                               | 5.77-11.85 |
|                               |        |            | OO        | 10                              | 4.27-8.3   |
|                               |        | UCB        | AA        | 2                               | 5.84-10.07 |
|                               |        |            | OA        | 2                               | 6.34-11.67 |
|                               |        |            | OO        | 19                              | 3.63-9.14  |
| Yes                           | EXP3   | AA         | 6         | 5.3-10.07                       |            |
|                               |        | OA         | 2         | 5.77-11.08                      |            |
|                               |        | OO         | 8         | 5.24-8.64                       |            |
|                               | UCB    | AA         | 2         | 4.4-11.85                       |            |
|                               |        | OA         | 2         | 4.79-10.52                      |            |
|                               |        | OO         | 13        | 3.46-10.5                       |            |

Table ST5: **Sampling results for the structure of the L1 protuberance in the ribosome (PDB ID 1MZP).** The molecule contains 55 nucleotides and 8 players. Six different parameter sets per game type are shown. Values shown in blue highlight combinations providing conformations with RMSD values below 5Å. Elements highlighted in yellow correspond to the default GARN options for the molecule.
