# Supplementary material for: GARN: Sampling RNA 3D Structure Space with Game Theory and Knowledge-Based Scoring Strategies
Source: PubMed Central journal article supplement (PMC4551674; doi:10.1371/journal.pone.0136444), 2015-08-27
Supplement: pone.0136444.s019.pdf [file pone.0136444.s019.pdf]

| Score                  | Frozen    | Algorithm   | Game      | # conformations<br>w/ RMSD <11 Å | RMSD range        |
|------------------------|-----------|-------------|-----------|----------------------------------|-------------------|
| <b>Lennard-Jones</b>   | <b>No</b> | <b>EXP3</b> | <b>AA</b> | <b>8</b>                         | <b>7.14-14.53</b> |
|                        |           |             | OA        | 8                                | 6.8-20.31         |
|                        |           |             | OO        | 8                                | 8.23-19.1         |
|                        |           | UCB         | AA        | 6                                | 6.42-15.88        |
|                        |           |             | OA        | 4                                | 8.98-19.17        |
|                        | Yes       | EXP3        | AA        | 5                                | 9.03-14.52        |
|                        |           |             | OA        | 2                                | 9.45-16.77        |
|                        |           |             | OO        | 3                                | 6.79-18.94        |
|                        |           | UCB         | AA        | 6                                | 6.42-15.88        |
|                        |           |             | OA        | 4                                | 7.85-18.36        |
| Modified Lennard-Jones | No        | EXP3        | AA        | 8                                | 8.21-13.73        |
|                        |           |             | OA        | 5                                | 8.09-17.66        |
|                        |           |             | OO        | 2                                | 9.38-18.48        |
|                        |           | UCB         | AA        | 1                                | 9.15-17.21        |
|                        |           |             | OA        | 7                                | 8.76-17.04        |
|                        | Yes       | EXP3        | AA        | 7                                | 8.76-14.7         |
|                        |           |             | OA        | 9                                | 8.45-18.88        |
|                        |           |             | OO        | 4                                | 7.98-20.46        |
|                        |           | UCB         | AA        | 8                                | 8.27-17.7         |
|                        |           |             | OA        | 9                                | 8.11-18.27        |
| Gauss                  | No        | EXP3        | AA        | 1                                | 10.91-17.95       |
|                        |           |             | OA        | 9                                | 8.45-18.88        |
|                        |           |             | OO        | 3                                | 9.47-21.18        |
|                        |           | UCB         | AA        | 6                                | 6.67-15.69        |
|                        |           |             | OA        | 7                                | 6.54-16.52        |
|                        | Yes       | EXP3        | AA        | 6                                | 8.49-16.92        |
|                        |           |             | OA        | 5                                | 9-20.69           |
|                        |           |             | OO        | 5                                | 7.85-21.82        |
|                        |           | UCB         | AA        | 6                                | 9-17.29           |
|                        |           |             | OA        | 2                                | 9.92-20.69        |
| 1/d <sup>2</sup>       | No        | EXP3        | AA        | 0                                | 11.19-16.93       |
|                        |           |             | OA        | 8                                | 7.67-18.82        |
|                        |           |             | OO        | 1                                | 9.11-20.1         |
|                        |           | UCB         | AA        | 6                                | 8.65-16.48        |
|                        |           |             | OA        | 5                                | 8.6-16.68         |
|                        | Yes       | EXP3        | AA        | 3                                | 7.25-16.92        |
|                        |           |             | OA        | 12                               | 7.55-17.74        |
|                        |           |             | OO        | 4                                | 8.23-20.63        |
|                        |           | UCB         | AA        | 8                                | 8.28-16.18        |
|                        |           |             | OA        | 9                                | 8.89-18.47        |
| OO                     | OO        | 5           | 7.2-19.09 |                                  |                   |

Table ST6: **Sampling results for the xpt-pbuX guanine riboswitch aptamer domain (PDB ID 4FE5)**. The molecule contains 67 nucleotides and 13 players. Six different parameter sets per game type are shown. Values shown in blue highlight combinations providing conformations with RMSD values below 8Å. Elements highlighted in yellow correspond to the default GARN options for the molecule.
