# Supplementary material for: GARN: Sampling RNA 3D Structure Space with Game Theory and Knowledge-Based Scoring Strategies
Source: PubMed Central journal article supplement (PMC4551674; doi:10.1371/journal.pone.0136444), 2015-08-27
Supplement: pone.0136444.s020.pdf [file pone.0136444.s020.pdf]

| Score                         | Frozen    | Algorithm   | Game      | # conformations<br>w/ RMSD <13 Å | RMSD range         |
|-------------------------------|-----------|-------------|-----------|----------------------------------|--------------------|
| Lennard-Jones                 | No        | EXP3        | AA        | 8                                | <b>9.68-20.64</b>  |
|                               |           |             | OA        | 0                                | 17.59-27.65        |
|                               |           |             | OO        | 0                                | 14.8-32.25         |
|                               |           | UCB         | AA        | 0                                | 14.65-26.16        |
|                               |           |             | OA        | 1                                | 12.71-27.07        |
|                               |           |             | OO        | 2                                | 11.99-29.58        |
|                               | Yes       | EXP3        | AA        | 3                                | 11.51-22.35        |
|                               |           |             | OA        | 0                                | 18.17-25.05        |
|                               |           |             | OO        | 0                                | 14.29-27.13        |
|                               |           | UCB         | AA        | 3                                | <b>10.18-31.56</b> |
|                               |           |             | OA        | 0                                | 15.18-28.79        |
|                               |           |             | OO        | 0                                | 14.08-29.4         |
| <b>Modified Lennard-Jones</b> | <b>No</b> | <b>EXP3</b> | <b>AA</b> | <b>5</b>                         | <b>10.04-25.07</b> |
|                               |           |             | OA        | 0                                | 16.04-26.36        |
|                               |           |             | OO        | 0                                | 16.19-24.80        |
|                               |           | UCB         | AA        | 0                                | 13.93-27.64        |
|                               |           |             | OA        | 0                                | 17.08-28.31        |
|                               |           |             | OO        | 0                                | 14.08-29.4         |
|                               | Yes       | EXP3        | AA        | 0                                | 13.03-20.26        |
|                               |           |             | OA        | 1                                | 11.79-28.80        |
|                               |           |             | OO        | 0                                | 18.76-31.88        |
|                               |           | UCB         | AA        | 0                                | 13.55-29.04        |
|                               |           |             | OA        | 0                                | 14.89-25.59        |
|                               |           |             | OO        | 0                                | 14.94-28.14        |
| Gauss                         | No        | EXP3        | AA        | 6                                | <b>10.07-29.88</b> |
|                               |           |             | OA        | 0                                | 15.60-27.91        |
|                               |           |             | OO        | 1                                | 12.76-26.78        |
|                               |           | UCB         | AA        | 0                                | 15.59-29.68        |
|                               |           |             | OA        | 0                                | 17.51-27.98        |
|                               |           |             | OO        | 0                                | 16.69-29.6         |
|                               | Yes       | EXP3        | AA        | 4                                | <b>10.08-27.64</b> |
|                               |           |             | OA        | 0                                | 15.82-23.24        |
|                               |           |             | OO        | 0                                | 22.7-24.61         |
|                               |           | UCB         | AA        | 0                                | 16.75-27.61        |
|                               |           |             | OA        | 0                                | 17.12-29.65        |
|                               |           |             | OO        | 2                                | <b>10.77-28.16</b> |
| 1/d <sup>2</sup>              | No        | EXP3        | AA        | 8                                | <b>10.74-22.13</b> |
|                               |           |             | OA        | 1                                | 11.71-23.85        |
|                               |           |             | OO        | 0                                | 16.13-21.79        |
|                               |           | UCB         | AA        | 0                                | 18.86-26.35        |
|                               |           |             | OA        | 0                                | 17.91-23.79        |
|                               |           |             | OO        | 0                                | 16.24-26.99        |
|                               | Yes       | EXP3        | AA        | 3                                | <b>9.83-23.79</b>  |
|                               |           |             | OA        | 0                                | 15.52-27.85        |
|                               |           |             | OO        | 0                                | 18.73-34.37        |
|                               |           | UCB         | AA        | 0                                | 16.24-26.12        |
|                               |           |             | OA        | 0                                | 17.25-26.38        |
|                               |           |             | OO        | 0                                | 16.74-27.35        |

Table ST7: **Sampling results for the structure of the core of the ternary S-domain complex of human signal recognition particle (PDB ID 1MFQ).** The molecule contains 127 nucleotides and 24 players. Six different parameter sets per game type are shown. Values shown in blue highlight combinations providing conformations with RMSD values below 11Å. Elements highlighted in yellow correspond to the default GARN options for the molecule.
