# Supplementary material for: GARN: Sampling RNA 3D Structure Space with Game Theory and Knowledge-Based Scoring Strategies
Source: PubMed Central journal article supplement (PMC4551674; doi:10.1371/journal.pone.0136444), 2015-08-27
Supplement: pone.0136444.s022.pdf [file pone.0136444.s022.pdf]

| PDB ID | # Nucleotides | # Players | Helix/Junction Ratio | # 3-way or 4-way junctions | Default Gameplay (Game/Algorithm/Score) |
|--------|---------------|-----------|----------------------|----------------------------|-----------------------------------------|
| 1MZP   | 55            | 8         | 1.3                  | 0                          | OA/UCB/Modified Lennard-Jones           |
| 4TS0   | 89            | 21        | 1.28                 | 0                          | OA/UCB/Modified Lennard-Jones           |
| 1E8O   | 49            | 8         | 2                    | 1 (3-way)                  | AA/EXP3/Lennard-Jones                   |
| 1LNG   | 97            | 16        | 1.6                  | 1 (3-way)                  | AA/EXP3/Lennard-Jones                   |
| 4WFL   | 107           | 18        | 1.8                  | 2 (3-way)                  | AA/EXP3/Lennard-Jones                   |
| 4FE5   | 67            | 14        | 1.75                 | 1 (3-way)                  | AA/EXP3/Lennard-Jones                   |
| 4QJH   | 72            | 15        | 1.4                  | 1 (3-way)                  | AA/EXP3/Modified Lennard-Jones          |
| 4QK8   | 124           | 20        | 1.3                  | 2 (3-way)                  | AA/EXP3/Modified Lennard-Jones          |
| 1MFQ   | 127           | 24        | 1.44                 | 1 (3-way)                  | AA/EXP3/Modified Lennard-Jones          |
| 4GXY   | 172           | 32        | 1.15                 | 1 (3-way) and 1 (4-way)    | AA/EXP3/Modified Lennard-Jones.         |

Table ST9: **Gameplay settings for the test set.** The default gameplay scheme is based on the existence of high-order junctions, and on the ratio of the number of players in helices to the number of players in junctions.
