# Supplementary material for: GARN: Sampling RNA 3D Structure Space with Game Theory and Knowledge-Based Scoring Strategies
Source: PubMed Central journal article supplement (PMC4551674; doi:10.1371/journal.pone.0136444), 2015-08-27
Supplement: pone.0136444.s023.pdf [file pone.0136444.s023.pdf]

| PDB ID | # Nucleotides | # Players | H/J Ratio | RMSD                                                   | GARN<br>AA/EXP3/LJ | GARN<br>AA/EXP3/MLJ | GARN<br>OA/UCB/MLJ | iFoldRNA | MCSym | Farna | NAST  |
|--------|---------------|-----------|-----------|--------------------------------------------------------|--------------------|---------------------|--------------------|----------|-------|-------|-------|
| 1MZP   | 55            | 8         | 1.3       | min                                                    | 6.84               | 5.43                | 4.32               | 8.23     | NA    | 5.61  | 12.97 |
|        |               |           |           | max                                                    | 11.62              | 11.85               | 10.58              | 12.68    | NA    | 17.80 | 26.38 |
|        |               |           |           | <i># of samples with RMSD &lt; 5Å (on 50 samples)</i>  | 1                  | 3                   | 7                  | 0        | –     | 0     | 0     |
| 4TS0   | 89            | 21        | 1.28      | min                                                    | 11.98              | 10.53               | 10.42              | NA       | NA    | 9.47  | 19.84 |
|        |               |           |           | max                                                    | 22.50              | 18.31               | 23.13              | NA       | NA    | 23.19 | 22.79 |
|        |               |           |           | <i># of samples with RMSD &lt; 5Å (on 50 samples)</i>  | 1                  | 2                   | 4                  | –        | –     | 4     | 0     |
| 1E8O   | 49            | 8         | 2         | min                                                    | 6.82               | 8.75                | 8.64               | 12.62    | 6.75  | 7.78  | 12.34 |
|        |               |           |           | max                                                    | 15.40              | 12                  | 16.2               | 17.71    | 15.55 | 21.02 | 20.29 |
|        |               |           |           | <i># of samples with RMSD &lt; 8Å (on 50 samples)</i>  | 13                 | 0                   | 0                  | 0        | 1     | 1     | 0     |
| 4FE5   | 67            | 14        | 1.75      | min                                                    | 7.14               | 8.21                | 8.11               | 15.04    | NA    | 7.80  | 17.00 |
|        |               |           |           | max                                                    | 14.53              | 13.73               | 18.27              | 20.12    | NA    | 20.98 | 34.17 |
|        |               |           |           | <i># of samples with RMSD &lt; 9Å (on 50 samples)</i>  | 2                  | 2                   | 3                  | 0        | –     | 1     | 0     |
| 4QJH   | 72            | 15        | 1.4       | min                                                    | 7.87               | 10.56               | 10.13              | 11.34    | NA    | 8.99  | 23.44 |
|        |               |           |           | max                                                    | 14.93              | 15.31               | 20.32              | 21.24    | NA    | 18.67 | 26.57 |
|        |               |           |           | <i># of samples with RMSD &lt; 9Å (on 50 samples)</i>  | 3                  | 0                   | 0                  | 0        | –     | 1     | 0     |
| 1LNG   | 97            | 16        | 1.6       | min                                                    | 9.11               | 7.85                | 10.13              | 11.92    | 10.52 | 12.67 | 36.49 |
|        |               |           |           | max                                                    | 17.63              | 17.07               | 20.32              | 35.53    | 29.58 | 30.19 | 59.66 |
|        |               |           |           | <i># of samples with RMSD &lt; 10Å (on 50 samples)</i> | 1                  | 6                   | 0                  | 0        | –     | 0     | 0     |
| 4WFL   | 107           | 18        | 1.8       | min                                                    | 9.79               | 8.82                | 14.70              | 18.08    | NA    | 11.33 | 43.41 |
|        |               |           |           | max                                                    | 17.21              | 16.22               | 21.38              | 25.75    | NA    | 26.00 | 47.04 |
|        |               |           |           | <i># of samples with RMSD &lt; 10Å (on 50 samples)</i> | 1                  | 5                   | 0                  | 0        | –     | 0     | 0     |
| 4QK8   | 124           | 20        | 1.3       | min                                                    | 12.25              | 13.70               | 13.23              | 18.66    | NA    | 13.61 | 54.43 |
|        |               |           |           | max                                                    | 22.78              | 23.13               | 22.19              | 28.49    | NA    | 29.41 | 59.44 |
|        |               |           |           | <i># of samples with RMSD &lt; 14Å (on 50 samples)</i> | 3                  | 1                   | 1                  | 0        | –     | 1     | 0     |
| 1MFQ   | 127           | 24        | 1.44      | min                                                    | 10.49              | 9.68                | 14.89              | 20.42    | 16.07 | 16.13 | 38.91 |
|        |               |           |           | max                                                    | 21.05              | 20.64               | 25.59              | 34.08    | 30.97 | 41.27 | 44.17 |
|        |               |           |           | <i># of samples with RMSD &lt; 11Å (on 50 samples)</i> | 3                  | 7                   | 0                  | 0        | –     | 0     | 0     |
| 4GXY   | 172           | 32        | 1.15      | min                                                    | 24.32              | 14.27               | 21.99              | NA       | NA    | 15.84 | 69.04 |
|        |               |           |           | max                                                    | 36.17              | 31.04               | 38.13              | NA       | NA    | 26.17 | 74.83 |
|        |               |           |           | <i># of samples with RMSD &lt; 15Å (on 50 samples)</i> | 0                  | 2                   | NA                 | 0        | –     | 0     | 0     |

Table ST10: **Comparison with other methods.** Elements in blue indicate the results for the GARN default settings.
