# Supplementary material for: GARN: Sampling RNA 3D Structure Space with Game Theory and Knowledge-Based Scoring Strategies
Source: PubMed Central journal article supplement (PMC4551674; doi:10.1371/journal.pone.0136444), 2015-08-27
Supplement: pone.0136444.s024.pdf [file pone.0136444.s024.pdf]

| PDB ID | # Nucleotides | GARN*    |              | iFoldRNA |              | MC-SYM |              | FARNA*   |              | NAST*    |              |
|--------|---------------|----------|--------------|----------|--------------|--------|--------------|----------|--------------|----------|--------------|
|        |               | Time     | # structures | Time     | # structures | Time   | # structures | Time     | # structures | Time     | # structures |
| 1MZP   | 55            | ~ 5 min  | 50           | ~ 1 h 40 | 50           | NA     | NA           | ~ 5 min  | 50           | ~ 15 min | 50           |
| 1E8O   | 49            | ~ 5 min  | 50           | ~ 1 h 30 | 50           | ~ 10 h | 18           | ~ 5 min  | 50           | ~ 10 min | 50           |
| 4FE5   | 67            | ~ 30 min | 50           | ~ 2h30   | 50           | NA     | NA           | ~ 4 h    | 43           | ~ 20 min | 50           |
| 4QJH   | 74            | ~ 30 min | 50           | ~ 2h     | 50           | NA     | NA           | ~ 4 h 30 | 50           | ~ 20 min | 50           |
| 4TS0   | 89            | ~ 1h     | 50           | ~ NA     | NA           | ~ 8 h  | 50           | ~ 4 h    | 50           | ~ 25 min | 50           |
| 1LNG   | 97            | ~ 1h     | 50           | ~ 3h     | 50           | ~ 8 h  | 50           | ~ 4 h    | 50           | ~ 25 min | 50           |
| 4WFL   | 107           | ~ 2h     | 50           | ~ 3h     | 50           | NA     | NA           | ~4 h 30  | 50           | ~ 25 min | 50           |
| 4QK8   | 124           | ~ 2h     | 50           | ~ 4h     | 50           | NA     | NA           | ~ 5 h    | 50           | ~ 25 min | 50           |
| 1MFQ   | 127           | ~ 2 h    | 50           | ~ 4 h 30 | 50           | ~ 6 h  | 4            | ~ 5 h    | 8            | ~ 25 min | 50           |
| 4GXY   | 172           | ~ 12 h   | 50           | NA       | NA           | NA     | NA           | ~ 30 h   | 6            | ~ 25 min | 50           |

Table ST11: **Computation time and number of output pdb files generated for all the compared methods.** \* indicates that the computation was performed locally on an Intel Xeon E5607 2.27GHz CPU. NAST computation was also performed with OpenCL on a NVIDIA Quadro 5000 GPU. Other computations were performed on dedicated servers. NAST appears to be much faster than the other methods, but it calculates only secondary structure interactions: the lack on tertiary information as input only allows for extended structures as a result. The computation time for RNAJAG was not available from [30].
