# Supplementary material for: GARN: Sampling RNA 3D Structure Space with Game Theory and Knowledge-Based Scoring Strategies
Source: PubMed Central journal article supplement (PMC4551674; doi:10.1371/journal.pone.0136444), 2015-08-27
Supplement: pone.0136444.s025.pdf [file pone.0136444.s025.pdf]

| <b>PDB</b> | <b>Nts</b> | <b>Nodes</b> | <b>GARN min</b> | <b>GARN max</b> | <b>RNAJAG</b> |
|------------|------------|--------------|-----------------|-----------------|---------------|
| 2FK6       | 52         | 11           | 9.56            | 11.80           | 4.01          |
| 1DK1       | 57         | 13           | 4.58            | 6.71            | 6.16          |
| 1MMS       | 58         | 11           | 4.21            | 6.96            | 4.13          |
| 3EGZ       | 65         | 10           | 6.57            | 8.13            | 6.59          |
| 3D2G       | 77         | 14           | 4.67            | 7.52            | 2.07          |
| 2HOJ       | 78         | 15           | 1.99            | 11.99           | 2.18          |
| 2GDI       | 80         | 15           | 4.58            | 7.94            | 1.98          |
| 1LNG       | 97         | 16           | 4.99            | 7.19            | 9.04          |
| 1MFQ       | 127        | 24           | 4.70            | 5.71            | 5.26          |

Table ST12: **Comparison with RNAJAG for three-way junctions.** GARN RMSD values are calculated only for the coarse-grained representation of the three-way junction. RNAJAG RMSD values were obtained from [30]. Elements in blue had the lowest RMSD values.
